# Supplementary material
Source: MDPI journal article supplement (https://www.mdpi.com/2072-4292/8/8/660)
Supplement: s1 [file s1]

# Spectral Indices to Improve Crop Residue Cover Estimation under Varying Moisture Conditions

Miguel Quemada <sup>1,\*</sup> and Craig S. T. Daughtry <sup>2</sup>

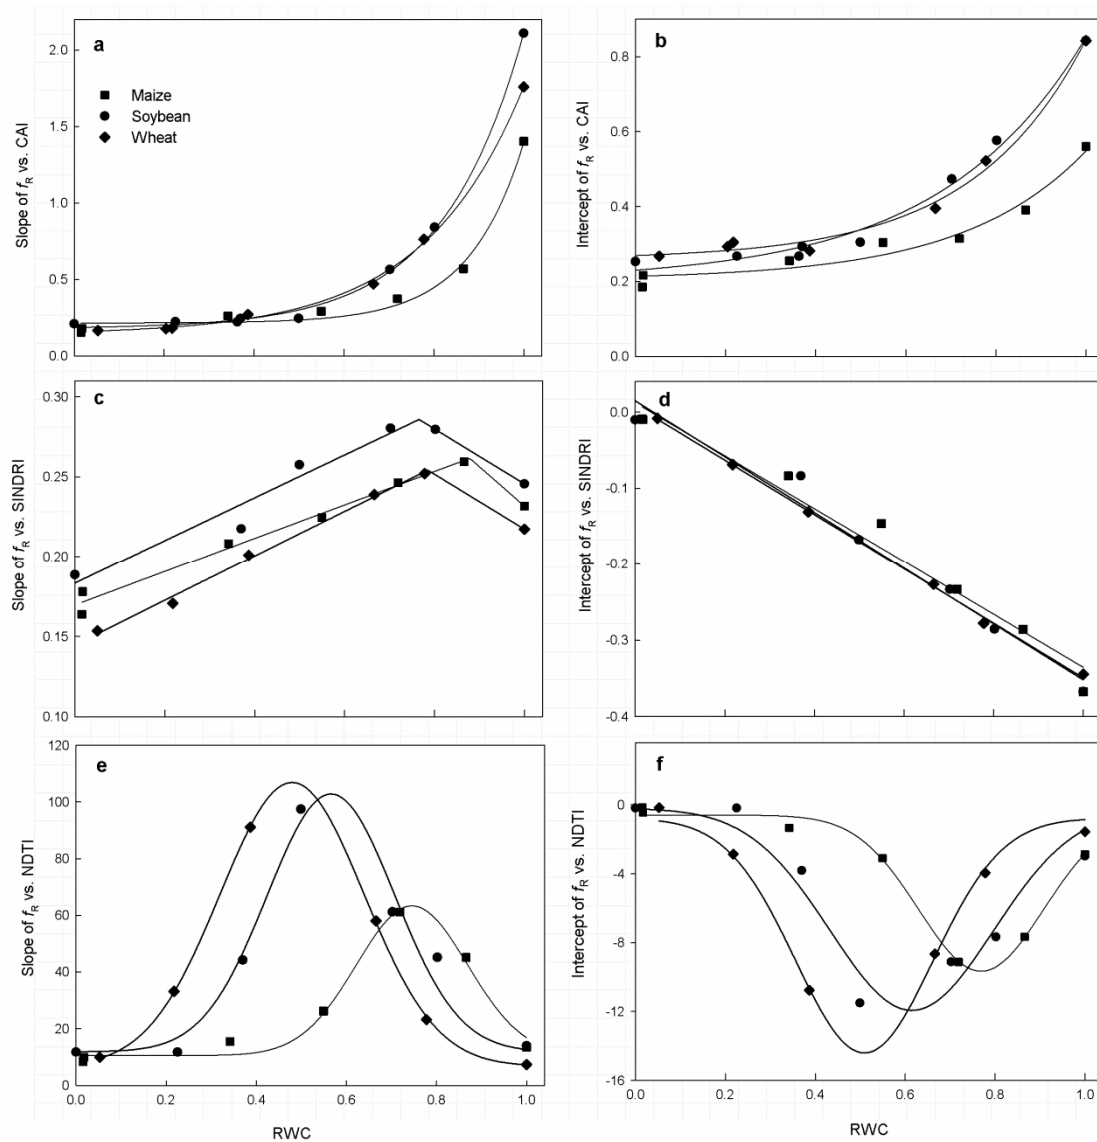

**Figure S1.** Slopes and intercepts of residue cover ( $f_R$ ) vs. the cellulose adsorption index (CAI), the shortwave infrared normalized difference residue index (SINDRI) and the normalized difference tillage index (NDTI) as a function of relative water content (RWC). Symbols represent values obtained from the linear combination of the reflectance factors for mixed scenes of each crop residue and Matawan soil. Lines are the modeled values calculated using the regression coefficients presented in Table 4.

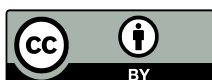

© 2016 by the authors; licensee MDPI, Basel, Switzerland. This article is an open access article distributed under the terms and conditions of the Creative Commons by Attribution (CC-BY) license (<http://creativecommons.org/licenses/by/4.0/>).
